# Supplementary material
Source: Springer Nature journal article supplement (https://www.springermedizin.de/resource/supplementary/12937_2011_445_MOESM3_ESM.pdf/25653118)
Supplement: MOESM3 [file 25653118]

## Street food score

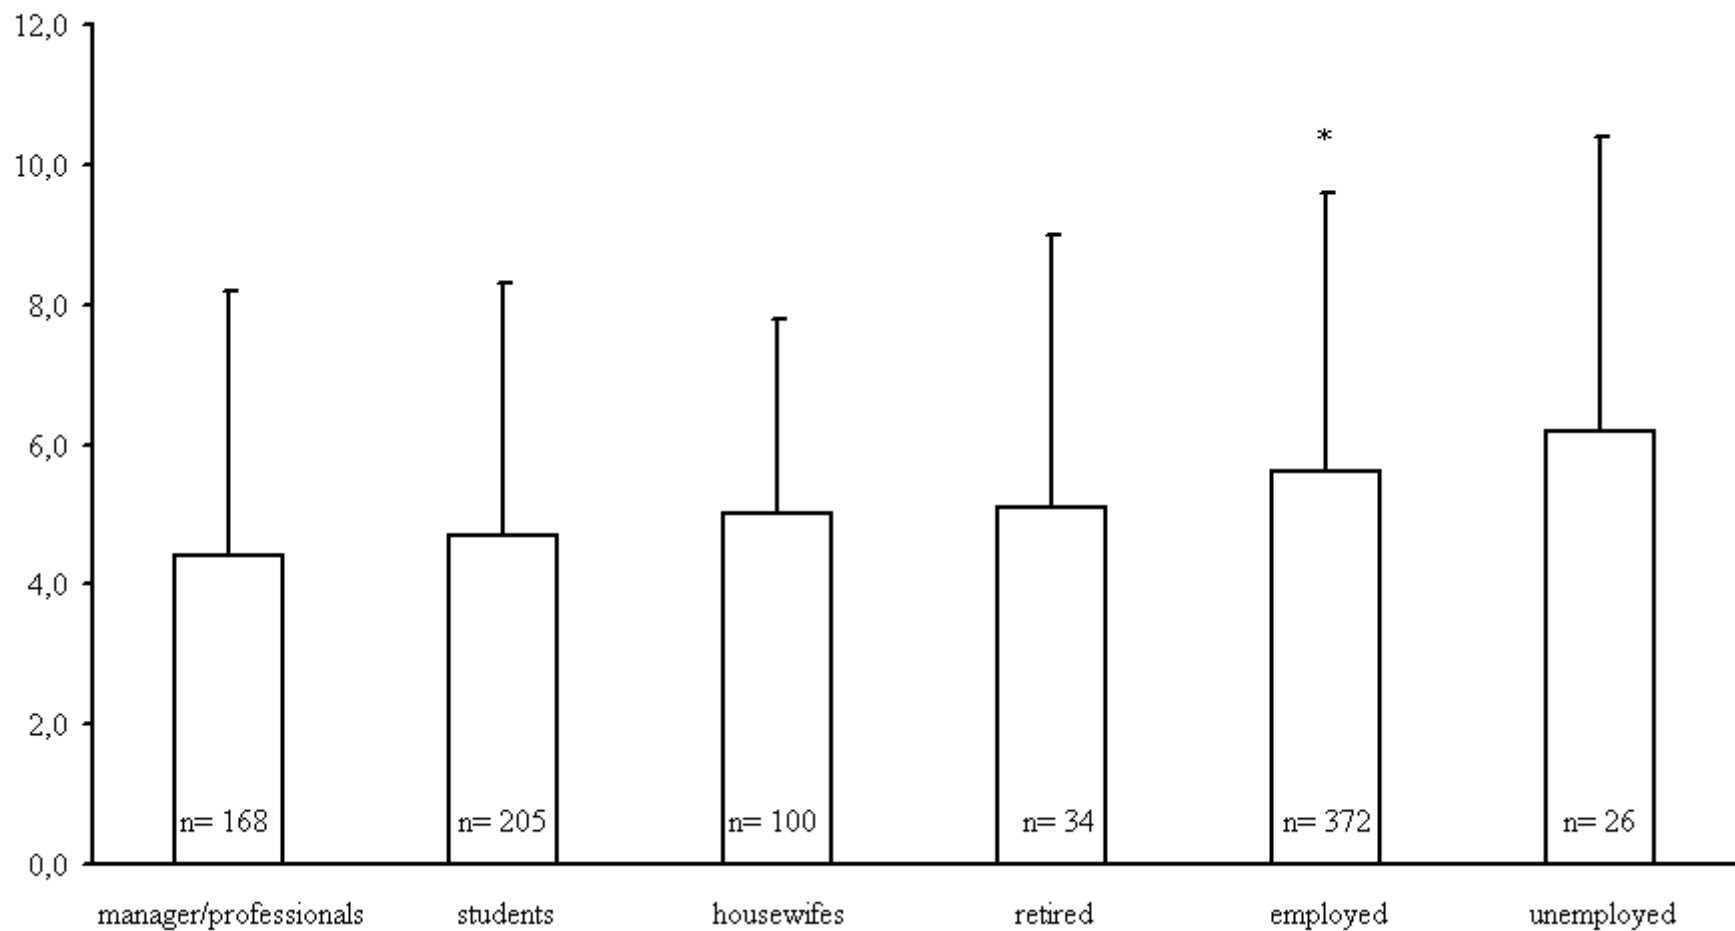

ANOVA:  $F= 3.44$ ,  $P < 0.005$  with  $*P < 0.05$  vs. manager professionals  
97 subjects refused to give information about their employment status
